# Supplementary material
Source: PubMed Central journal article supplement (PMC275563)
Supplement: nar_31_22_6624__1.pdf [file nar_31_22_6624__1.pdf]

## **SUPPLEMENTARY MATERIAL**

### **LEGEND TO THE FIGURES**

#### **Annex 1**

(A). p73 mRNA levels analyzed in HCT116 cells by Real time PCR 24 hours after treatment with DX (24 hours). Data are expressed as fold induction over untreated cells mRNA levels.

(B). p73 mRNA levels analyzed in SH-SY5Y cells by Real time PCR 24 hours after treatment with DDP (2 hours). Data are expressed as fold induction over untreated cells mRNA levels.

(C). Effect of DDP on human p73 promoter activity.

Fragments 1.8 Kb and 1.2 Kb of the human p73 promoter were transfected in SH-SY5Y cells. Transfected cells were either untreated or treated with 30  $\mu$ M DDP for 24 hours before analysis of luciferase activity.

#### **Annex 2**

Effect of increasing amounts of C-EBP $\alpha$  expression plasmid on p73 mRNA levels in SH-SY5Y cells untreated or treated with 1  $\mu$ M DX for 24 hours.

#### **Annex 3**

Levels of topoisomerase I in nuclei and cytoplasm of SH-SY5Y cells untreated or treated for 24 hours with DX.

#### **Annex 4**

Co-immunoprecipitation of C-EBP $\alpha$  and E2F1 in SH-SY5Y cells. Cellular extracts from untreated or DX-treated SH-SY5Y cells were immunoprecipitated with anti C-EBP $\alpha$  or anti E2F1 antibodies. Immunoprecipitates were separated on SDS-PAGE and the blots hybridized with anti E2F1 antibodies.

**A**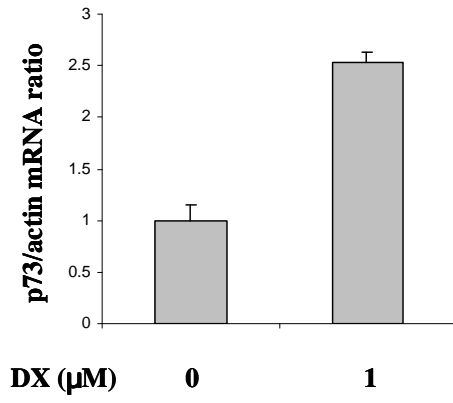**B**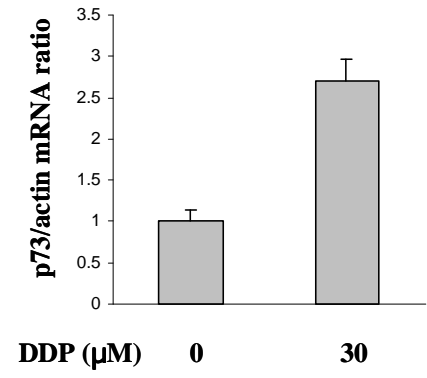**C**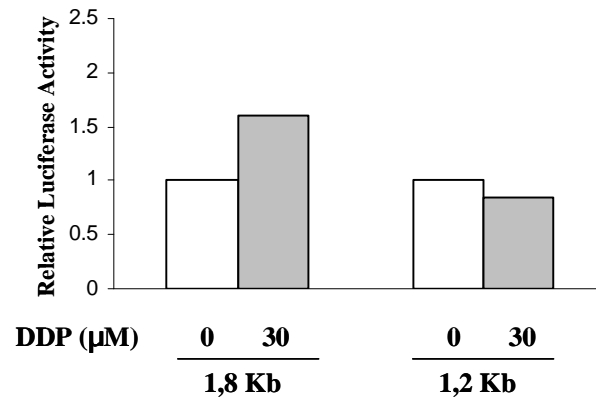**Annex 1**

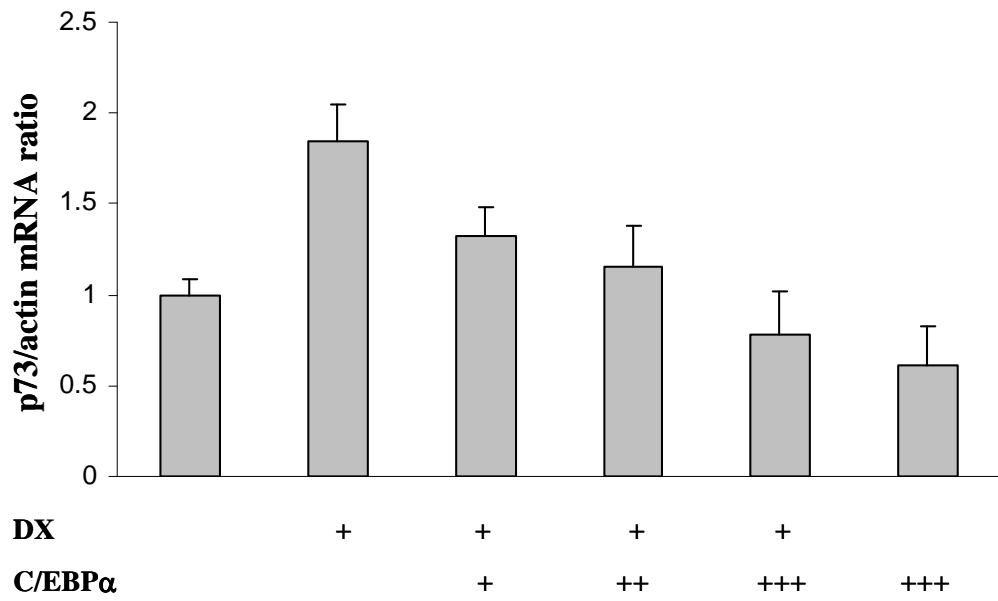

**Annex 2**

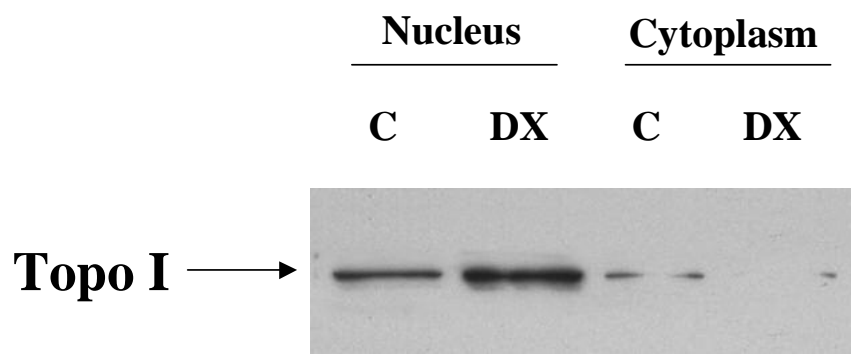

**Annex 3**

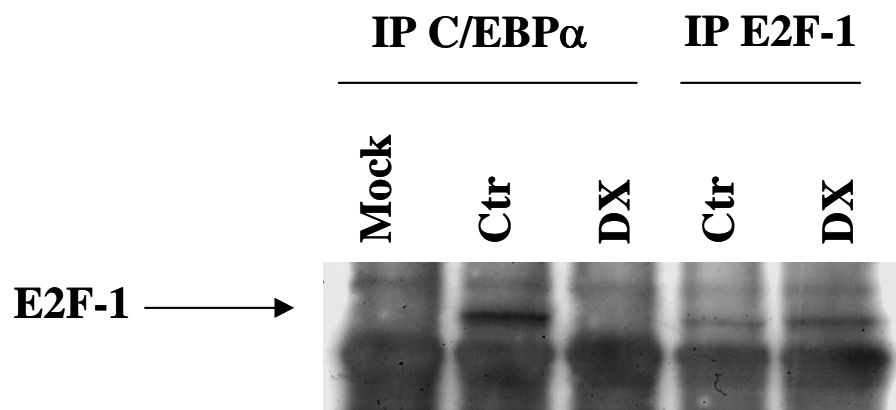

**Annex 4**
